# Supplementary material for: Joint Hypermobility and Clinical Correlates in a Group of Patients With Eating Disorders
Source: Frontiers journal article supplement (doi:10.3389/fpsyt.2021.803614), 2022-01-12
Supplement: Table_1.DOCX [file Table_1.DOCX]

**Table 1.** Comparison of characteristics between ED patients with and without JHM.

| Variable | **ED without JHM**  58.5% [31] | **ED with JHM**  41.5% [22] | OR [95% CI] | *p* value |
| --- | --- | --- | --- | --- |
| **Sociodemographics** | % [n] / Mean (SD) | % [n] / Mean (SD) |
| Age | 31.03 (11.02) | 22.77 (2.07) | .904 [.839 ; 974] | .008 |
| Women | 87.1% [27] | 100% [22] | - | .080* |
| Years of study | 13.68 (2.40) | 12.90 (2.07) | .854 [.656 ; 1.113] | .244 |
| **ED characteristics** |  |  |  |  |
| Age at onset | 17.60 (5.63) | 16.35 (3.16) | .939 [.816 ; 1.080] | .379 |
| Age first consultation | 23.77 (9.53) | 18.00 (2.64) | .871 [.752 ;1.010] | .067 |
| Duration of ED (in years) | 12.93 (9.07) | 6.25 (6.73) | .891 [.811 ; .978] | .015 |
| Anorexia nervosa | 61.2% [19] | 77.2% [17] | 2.147 [.627 ; 7.358] | .224 |
| *Type of anorexia nervosa:*  Restricting type  Bingeing/purging type | 73.7% [14]  26.3% [5] | 37.5% [6]  62.5% [10] | 4.66 [1.108 ; 19.652] | .036 |
| Bulimia nervosa | 19.3% [6] | 18.1% [4] | .980 [.240 ; 4.004] | .978 |
| Other ED | 19.3% [6] | 4.5% [1] | .219 [.024 ; 1.978] | .176 |
| **Psychiatric comorbidity (lifetime)** |  |  |  |  |
| Major depressive disorder | 75.9% [22] | 62.5% [10] | .530 [.141 ;1.98] | .347 |
| Suicide attempt | 30% [9] | 14.3% [3] | .389 [.091 ; 1.659] | .202 |
| Anxiety disorders | 58.6% [17] | 66.7% [10] | 1.412 [.383 ; 5.19] | .604 |
| Substance abuse and/or dependence | 10.3% [3] | 13.3% [2] | 1.33 [.198 ; 8.996] | .768 |
| **Somatic / health variables (lifetime)** |  |  |  |  |
| BMI | 19.31 (6.2) | 20.22 (4.8) | 1.029 [.924 ; 1.134] | .564 |
| Age of menarche | 13.76 (2.43) | 12.67 (.976) | .689 [.422 ; 1.125] | .136 |
| Somatic comorbidity | 25.8% [8] | 31.8% [7] | 1.342 [.402 ; 4.477] | .633 |
| Fractures | 19.4% [6] | 4.5% [1] | .198 [.022 ; 1.782] | .149 |
| Dislocations | 10.7% [3] | 9.5% [2] | .877 [.133 ; 5.783] | .892 |
| Easy bruising | 57.1% [16] | 95.2% [20] | 15.0 [1.759 ; 127.913] | .013 |
| Moderate and severe fatigue (usual) | 80.6% [25] | 77.3% [17] | .816 [.214 ; 3.108] | .766 |
| Moderate and severe pain (usual) | 35.5% [11] | 61.9 [13] | 2.955 [.938 ; 9.309] | .064 |
| Joint pain | 25% [7] | 57.1% [12] | 4.00 [1.186 ; 13.495] | .025 |
| Thin skin | 17.9% [5] | 42.9% [9] | 3.45 [.943 ; 12.621] | .061 |
| Varicose veins | 14.3% [4] | 4.8% [1] | .300 [.031 ; 2.904] | .299 |
| Stretch marks | 50% [14] | 61.9% [13] | 1.625 [.514 ; 5.136] | .408 |
| Physiotherapy consultation | 35.7% [10] | 61.9% [13] | 2.925 [.906 ; 9.442] | .073 |
| **Psychological dimensions** |  |  |  |  |
| *Detail and Flexibility Questionnaire:*  Cognitive rigidity | 51.43 (8.16) | 45.15 (12.14) | .939 [.884 ; 998] | .041 |
| Attention to detail | 43.60 (8.66) | 39.65 (12.15) | .962 [907 ; 1.019] | .186 |
| *Eating Disorders Examination Questionnaire:*  Restraint | 3.50 (2.55) | 2.20 (2.16) | .787 [.490 ; 1.265] | .323 |
| Eating concern | 2.43 (1.90) | 1.00 (1.41) | .539 [.148 ; 1.958] | .347 |
| Weight concern | 3.20 (1.64) | 4.25 (.957) | 1.904 [.621 ; 5.837] | .260 |
| Shape concern | 4.80 (1.64) | 5.25 (.957) | 1.366 [.426 ; 4.379] | .600 |
| *Eating Disorders Inventory 2:*  Drive for thinness | 4.46 (3.89) | 4.45 (4.74) | .999 [.872 ; 1.145] | .989 |
| Bulimia | 5.43 (4.15) | 5.80 (4.37) | 1.021 [.892 ; 1.170] | .760 |
| Body dissatisfaction | 4.76 (2.97) | 3.80 (2.87) | .885 [7.17 ; 1.094] | .259 |
| Ineffectiveness | 6.56 (3.74) | 7.10 (4.37) | 1.035 [.896 ; 1.195] | .639 |
| Perfectionnisme | 4.73 (3.59) | 6.00 (3.12) | 1.118 [.942 ; 1.328] | .202 |
| Interpersonal distrust | 4.63 (2.69) | 4.25 (2.98) | .951 [.772 ; 1.170] | .632 |
| Interoceptive awareness | 8.66 (4.48) | 8.55 (4.75) | .994 [.877 ;1.127] | .928 |
| Asceticism | 7.26 (2.65) | 7.05 (2.34) | .966 [767 ; 1.216] | .769 |
| Impulse regulation | 12.76 (5.83) | 12.15 (5.46) | .981 [.885 ; 1.087] | .711 |
| Social insecurity | 4.60 (2.13) | 5.10 (2.53) | 1.095 [.857 ; 1.400] | .468 |
| Maturity fears | 6.62 (3.02) | 6.00 (3.75) | .943 [.789 ; 1.128] | .522 |

ED: eating disorder; BMI: body mass index; CI=Confidence Interval; OR=Odds ratio, SD: standard deviation; *= chi-square
