# Supplementary material for: Joint Hypermobility and Clinical Correlates in a Group of Patients With Eating Disorders
Source: Frontiers journal article supplement (doi:10.3389/fpsyt.2021.803614), 2022-01-12
Supplement: Table_2.DOCX [file Table_2.DOCX]

**Table 2** Multivariate regression logistic models with JHM status as dependent variable.

| **Model 1** | **OR [95%CI]*** | ***p* value*** |
| --- | --- | --- |
| Duration of ED | .847 [.719 ; 997] | .047 |
| Anorexia nervosa subtype | 7.769 [.798 ; 75.634] | .077 |
| Cognitive rigidity | .878 [.777 ; .992] | .037 |
| Joint pain | .880 [.102 ; 7.62] | .908 |
| **Model 2** | **OR [95%CI]*** | ***p* value*** |
| Age | .850 [.730 ; .990] | .036 |
| Anorexia nervosa subtype | 9.567 [ .894 ; 102.43] | .062 |
| Cognitive rigidity | .872 [.779 ; .975] | .017 |
| Joint pain | .723 [.081 ; 6.485] | .772 |

CI=Confidence Interval; OR= Odds ratios; ED=eating disorders.
